# Supplementary material for: Identification of an EMT-Related Gene Signature for Predicting Overall Survival in Gastric Cancer
Source: Front Genet. 2021 Jun 24;12:661306. doi: 10.3389/fgene.2021.661306 (PMC8264558; doi:10.3389/fgene.2021.661306)
Supplement: Supplementary Table 6 — The profiles of the EMT-related gene signature based nomogram and models with different factors’ combinations. [file Table_6.XLSX]

## Sheet: Sheet1
Supplementary Table 6. The profiles of the EMT-related gene signature based nomogram and models with different factors’ combinations
	nomogram COX PH		age + TNM stage + LNR COX PH		age + TNM stage + risk score COX PH		age + LNR + risk score COX PH		TNM stage + LNR + risk score COX PH		age + TNM stage COX PH		age + LNR COX PH		age + risk score COX PH		TNM stage + risk score COX PH		TNM stage + LNR COX PH		LNR + risk score COX PH
	HR (95% CI)	p-value	HR (95% CI)	p-value	HR (95% CI)	p-value	HR (95% CI)	p-value	HR (95% CI)	p-value	HR (95% CI)	p-value	HR (95% CI)	p-value	HR (95% CI)	p-value	HR (95% CI)	p-value	HR (95% CI)	p-value	HR (95% CI)	p-value
Age	1.029 (1.008-1.052)	0.008	1.026 (1.004-1.049)	0.019	1.029 (1.007-1.050)	0.008	1.023 (1.003-1.045)	0.028			1.027 (1.005-1.049)	0.015	1.020 (0.999-1.041)	0.062	1.018 (0.998-1.039)	0.071
Stage II/I	1.182 (0.532-2.626)	0.681	1.118 (0.506-2.467)	0.783	1.406 (0.637-3.102)	0.396			1.181 (0.532-2.625)	0.683	1.300 (0.593-2.850)	0.513					1.393 (0.633-3.066)	0.41	1.148 (0.519-2.540)	0.734
Stage III/I	1.258 (0.552-2.867)	0.585	1.057 (0.469-2.384)	0.893	2.153 (1.042-4.451)	0.038			1.719 (0.519-2.678)	0.693	2.007 (0.981-4.110)	0.057					2.007 (0.977-4.124)	0.058	1.011 (0.448-2.282)	0.979
Stage IV/I	3.050 (1.235-7.533)	0.016	2.682 (1.104-6.517)	0.029	5.383 (2.404-12.053)	<0.001			2.545 (1.045-6.199)	0.04	5.145 (2.312-11.452)	<0.001					4.454 (2.020-9.820)	<0.001	2.294 (0.957-5.500)	0.063
LNR	2.987 (1.412-6.322)	0.004	4.005 (1.923-8.345)	<0.001			3.986 (2.209-7.191)	<0.001	3.068 (1.423-6.616)	0.004			4.643 (2.587-8.331)	<0.001					4.184 (1.994-8.781)	<0.001	3.851 (2.105-7.044)	<0.001
Risk score	4.185 (2.039-8.588)	<0.001			5.238 (2.655-10.333)	<0.001	4.161 (2.076-8.340)	<0.001	3.611 (1.808-7.212)	<0.001					4.732 (0.532-8.845)	<0.001	4.682 (2.450-8.949)	<0.001			3.679 (1.876-7.217)	<0.001
AIC (traing set TCGA-STAD)	910.997		921.388		917.019		915.384		916.338		932.84		925.962		933.05		922.346		925.057		918.352
AIC (validation set GSE62254)	1518.42		1537.78		1529.15		1543.81		1526.73		1551.48		1541.14		1602.82		1536.32		1546.57		1544.86
